# Supplementary material for: Bacillus- and Lactobacillus-Based Dietary Synbiotics Are Associated with Shifts in the Oropharyngeal, Proximal Colonic, and Vaginal Microbiomes of Korean Native Black Pigs
Source: MDPI journal article supplement (doi:10.3390/fermentation9040359), 2023-04-06
Supplement: s1 [file Table_S1.xlsx]

## Sheet: denoising-stats
	Table S1: Denoising statistics of the sequences that passed the quality filtering process.
		Sample ID	Bodysite	Treatment group	Input	Filtered	Percentage of input passed filter (%)	Denoised	Merged	Percentage of input merged (%)	Non-chimeric	Percentage of input non-chimeric (%)
	1	10-34-G	Vagina	Bacillus-fed	159101	93540	58.79	90295	86547	54.4	81399	51.16
	2	10-34-O	Oropharyngeal	Bacillus-fed	135067	91842	68	89886	85661	63.42	71311	52.8
	3	10-34-S	Proximal colon	Bacillus-fed	125261	75058	59.92	69864	63588	50.76	56790	45.34
	4	10-35-G	Vagina	Bacillus-fed	131139	76387	58.25	73271	69605	53.08	65287	49.78
	5	10-35-O	Oropharyngeal	Bacillus-fed	141604	96065	67.84	93258	85599	60.45	70226	49.59
	6	10-35-S	Proximal colon	Bacillus-fed	113842	66900	58.77	61779	56919	50	53417	46.92
	7	10-42-G	Vagina	Bacillus-fed	150227	87342	58.14	82863	77796	51.79	73521	48.94
	8	10-42-O	Oropharyngeal	Bacillus-fed	110114	64183	58.29	61776	56161	51	46115	41.88
	9	10-42-S	Proximal colon	Bacillus-fed	100423	57582	57.34	53710	48909	48.7	43965	43.78
	10	11-16-G	Vagina	Bacillus-fed	77188	37371	48.42	35563	34005	44.05	33153	42.95
	11	11-16-O	Oropharyngeal	Bacillus-fed	125602	80860	64.38	78059	70279	55.95	54323	43.25
	12	11-16-S	Proximal colon	Bacillus-fed	104762	46073	43.98	40708	36474	34.82	33881	32.34
	13	11-2-G	Vagina	Bacillus-fed	132463	74764	56.44	70967	66653	50.32	62708	47.34
	14	11-2-O	Oropharyngeal	Bacillus-fed	152193	97866	64.3	95482	89685	58.93	77628	51.01
	15	11-2-S	Proximal colon	Bacillus-fed	132899	76098	57.26	70291	63103	47.48	55367	41.66
	16	10-33-S	Proximal colon	Control	80004	36364	45.45	32341	28809	36.01	27174	33.97
	17	10-40-S	Proximal colon	Control	78337	41001	52.34	36297	32423	41.39	30140	38.47
	18	10-43-S	Proximal colon	Control	114694	66954	58.38	60379	53175	46.36	47236	41.18
	19	10-G	Vagina	Control	138370	76735	55.46	73503	70080	50.65	67114	48.5
	20	10-O	Oropharyngeal	Control	114869	67069	58.39	65370	60944	53.06	48825	42.5
	21	11-21-S	Proximal colon	Control	128309	74559	58.11	68855	62794	48.94	56600	44.11
	22	11-5-S	Proximal colon	Control	107050	60179	56.22	54912	50115	46.81	45849	42.83
	23	6-G	Vagina	Control	138499	82428	59.52	80201	77902	56.25	72892	52.63
	24	6-O	Oropharyngeal	Control	129299	79549	61.52	76972	71571	55.35	59793	46.24
	25	7-G	Vagina	Control	120862	65845	54.48	63121	60625	50.16	58376	48.3
	26	7-O	Oropharyngeal	Control	96944	54630	56.35	52841	48861	50.4	39445	40.69
	27	8-G	Vagina	Control	142117	85926	60.46	83234	79945	56.25	73846	51.96
	28	8-O	Oropharyngeal	Control	131005	86074	65.7	83294	76008	58.02	59843	45.68
	29	9-G	Vagina	Control	138282	78496	56.77	74758	70555	51.02	66183	47.86
	30	9-O	Oropharyngeal	Control	130964	87243	66.62	83392	73217	55.91	58684	44.81
	31	F11-27-G	Vagina	Control	82043	35944	43.81	34743	33682	41.05	32705	39.86
	32	F11-27-O	Oropharyngeal	Control	93599	49637	53.03	47668	45023	48.1	39656	42.37
	33	F11-27-S	Proximal colon	Control	50576	17068	33.75	14804	12895	25.5	12577	24.87
	34	F11-41-G	Vagina	Control	63451	31290	49.31	30113	29548	46.57	27187	42.85
	35	F11-41-O	Oropharyngeal	Control	75800	41686	54.99	40538	38777	51.16	29697	39.18
	36	F11-41-S	Proximal colon	Control	89910	48076	53.47	45225	42117	46.84	37350	41.54
	37	F12-20-G	Vagina	Control	119727	73151	61.1	71100	69174	57.78	66919	55.89
	38	F12-20-O	Oropharyngeal	Control	147954	94064	63.58	91623	86389	58.39	69653	47.08
	39	F12-20-S	Proximal colon	Control	116754	65838	56.39	62312	57827	49.53	51313	43.95
	40	F12-9-G	Vagina	Control	125021	73104	58.47	69792	66433	53.14	62325	49.85
	41	F12-9-O	Oropharyngeal	Control	137603	89443	65	87328	81520	59.24	63585	46.21
	42	F12-9-S	Proximal colon	Control	132172	72922	55.17	68577	63987	48.41	60274	45.6
	43	F11-33-G	Vagina	LAB-fed	150619	92797	61.61	89533	82869	55.02	76724	50.94
	44	F11-33-O	Oropharyngeal	LAB-fed	134475	89081	66.24	87427	84020	62.48	70160	52.17
	45	F11-33-S	Proximal colon	LAB-fed	129226	73977	57.25	70346	65789	50.91	59965	46.4
	46	F11-34-G	Vagina	LAB-fed	132826	81124	61.08	78374	74756	56.28	68394	51.49
	47	F11-34-O	Oropharyngeal	LAB-fed	143450	95134	66.32	92267	86033	59.97	70721	49.3
	48	F11-34-S	Proximal colon	LAB-fed	121599	72714	59.8	68188	63891	52.54	57433	47.23
	49	F12-19-G	Vagina	LAB-fed	142260	85713	60.25	82896	80026	56.25	76346	53.67
	50	F12-19-O	Oropharyngeal	LAB-fed	165941	108293	65.26	104580	95835	57.75	78138	47.09
	51	F12-19-S	Proximal colon	LAB-fed	122157	69308	56.74	65573	61298	50.18	57082	46.73
	52	F12-21-G	Vagina	LAB-fed	117302	65061	55.46	62670	60680	51.73	58313	49.71
	53	F12-21-O	Oropharyngeal	LAB-fed	134647	87128	64.71	84910	80667	59.91	71782	53.31
	54	F12-21-S	Proximal colon	LAB-fed	141335	78713	55.69	74659	70500	49.88	62343	44.11
		Total			6551937	3856249		3682488	3441744		3051733
		Sequences per sample			121332	71412	58.8566	68194.2	63736	52.5302	56513.6	46.5776
