# Supplementary material for: Bacillus- and Lactobacillus-Based Dietary Synbiotics Are Associated with Shifts in the Oropharyngeal, Proximal Colonic, and Vaginal Microbiomes of Korean Native Black Pigs
Source: MDPI journal article supplement (doi:10.3390/fermentation9040359), 2023-04-06
Supplement: s1 [file Table_S2.xlsx]

## Sheet: Table_S2
Table S2: Dominant phyla in Oropharyngeal microbiota of the JBP gilts
	Sample ID	Treatment group	Proteobacteria Rel abund (%)	Proteobacteria mean (%)	Bacteroidetes Rel abund (%)	Bacteroidetes mean (%)	Fusobacteria Rel abund (%)	Fusobacteria mean (%)	Firmicutes Rel abund (%)	Firmicutes mean (%)	Other Rel abund (%)	Other mean (%)
1	10-34-O	Bacillus-fed	31.7441	35.3268	36.7938	34.5673	17.233	14.4657	12.1734	10.8633	2.05578	0.000464369
2	10-35-O	Bacillus-fed	31.5837	35.3268	41.1628	34.5673	13.71	14.4657	8.79874	10.8633	4.74468	0.000464369
3	10-42-O	Bacillus-fed	26.7093	35.3268	39.5576	34.5673	14.7154	14.4657	12.9069	10.8633	6.11081	0.000464369
4	11-16-O	Bacillus-fed	31.3348	35.3268	47.5029	34.5673	9.27784	14.4657	5.61641	10.8633	6.26806	0.000464369
5	11-2-O	Bacillus-fed	43.5616	35.3268	36.331	34.5673	8.12593	14.4657	8.98258	10.8633	2.99892	0.000464369
6	10-O	Control	14.3492	35.3268	44.6083	34.5673	18.8449	14.4657	10.8612	10.8633	11.3364	0.000464369
7	6-O	Control	29.1439	35.3268	37.1365	34.5673	15.353	14.4657	11.5131	10.8633	6.85365	0.000464369
8	7-O	Control	55.4012	35.3268	23.9853	34.5673	8.03144	14.4657	8.92128	10.8633	3.66079	0.000464369
9	8-O	Control	39.2895	35.3268	35.035	34.5673	8.99688	14.4657	11.2695	10.8633	5.40915	0.000464369
10	9-O	Control	24.0439	35.3268	46.5199	34.5673	15.618	14.4657	8.83666	10.8633	4.98159	0.000464369
11	F11-27-O	Control	37.8228	35.3268	24.8235	34.5673	13.6196	14.4657	16.807	10.8633	6.92707	0.000464369
12	F11-41-O	Control	38.2429	35.3268	15.8063	34.5673	24.0428	14.4657	18.0624	10.8633	3.84551	0.000464369
13	F12-20-O	Control	43.085	35.3268	23.3572	34.5673	20.2719	14.4657	9.28029	10.8633	4.00557	0.000464369
14	F12-9-O	Control	48.2394	35.3268	32.4149	34.5673	6.59747	14.4657	7.18251	10.8633	5.56578	0.000464369
15	F11-33-O	LAB-fed	45.2437	35.3268	19.9145	34.5673	16.6961	14.4657	15.9036	10.8633	2.24202	0.000464369
16	F11-34-O	LAB-fed	29.5923	35.3268	34.0125	34.5673	17.2353	14.4657	14.7679	10.8633	4.39191	0.000464369
17	F12-19-O	LAB-fed	29.1254	35.3268	38.4461	34.5673	17.6201	14.4657	8.95211	10.8633	5.85631	0.000464369
18	F12-21-O	LAB-fed	41.516	35.3268	35.2735	34.5673	13.1983	14.4657	6.29406	10.8633	3.7182	0.000464369
