# Supplementary material for: Bacillus- and Lactobacillus-Based Dietary Synbiotics Are Associated with Shifts in the Oropharyngeal, Proximal Colonic, and Vaginal Microbiomes of Korean Native Black Pigs
Source: MDPI journal article supplement (doi:10.3390/fermentation9040359), 2023-04-06
Supplement: s1 [file Table_S3.xlsx]

## Sheet: Table_S3
Table S3: Dominant phyla in Proximal colonic microbiota of the JBP gilts
	Sample ID	Treatment group	Firmicutes rel abund	Firmicutes mean	Bacteroidetes rel abund	Bacteroidetes mean	Unclassified Bacteria rel abund	Unclassified Bacteria mean	Spirochaetes rel abund	Spirochaetes mean	Other rel abund	Other mean
1	10-34-S	Bacillus-fed	77.1527	65.8582	14.6258	23.6372	2.19053	4.43791	3.7577	3.21481	2.27329	0.0018933
2	10-35-S	Bacillus-fed	57.6951	65.8582	24.2133	23.6372	6.4867	4.43791	9.07951	3.21481	2.52541	0.0018933
3	10-42-S	Bacillus-fed	55.9854	65.8582	31.4182	23.6372	7.39452	4.43791	1.46025	3.21481	3.74161	0.0018933
4	11-16-S	Bacillus-fed	71.4737	65.8582	15.9499	23.6372	2.4468	4.43791	6.74124	3.21481	3.38833	0.0018933
5	11-2-S	Bacillus-fed	62.2916	65.8582	30.4893	23.6372	2.51775	4.43791	1.19746	3.21481	3.50389	0.0018933
6	10-33-S	Control	72.5252	65.8582	22.0873	23.6372	1.24752	4.43791	1.27696	3.21481	2.86303	0.0018933
7	10-40-S	Control	58.7226	65.8582	31.5859	23.6372	2.73723	4.43791	3.92833	3.21481	3.02588	0.0018933
8	10-43-S	Control	59.1879	65.8582	34.154	23.6372	2.65052	4.43791	1.54331	3.21481	2.46422	0.0018933
9	11-21-S	Control	62.5636	65.8582	30.9558	23.6372	2.37102	4.43791	1.49117	3.21481	2.61837	0.0018933
10	11-5-S	Control	60.8694	65.8582	32.6572	23.6372	2.13527	4.43791	1.69906	3.21481	2.6391	0.0018933
11	F11-27-S	Control	80.6472	65.8582	14.1767	23.6372	1.70152	4.43791	2.23424	3.21481	1.24036	0.0018933
12	F11-41-S	Control	74.1901	65.8582	12.8005	23.6372	5.09772	4.43791	6.57564	3.21481	1.33601	0.0018933
13	F12-20-S	Control	76.5985	65.8582	19.6773	23.6372	1.77733	4.43791	0.670395	3.21481	1.27648	0.0018933
14	F12-9-S	Control	71.3691	65.8582	20.0153	23.6372	2.13691	4.43791	1.78518	3.21481	4.69357	0.0018933
15	F11-33-S	LAB-fed	71.0214	65.8582	21.8594	23.6372	5.08297	4.43791	0.962228	3.21481	1.07396	0.0018933
16	F11-34-S	LAB-fed	47.5615	65.8582	24.9856	23.6372	15.9995	4.43791	6.32215	3.21481	5.1312	0.0018933
17	F12-19-S	LAB-fed	68.0249	65.8582	27.5446	23.6372	1.8815	4.43791	0.604394	3.21481	1.94457	0.0018933
18	F12-21-S	LAB-fed	69.9341	65.8582	18.9612	23.6372	3.74862	4.43791	3.47593	3.21481	3.88015	0.0018933
