# Supplementary material for: Bacillus- and Lactobacillus-Based Dietary Synbiotics Are Associated with Shifts in the Oropharyngeal, Proximal Colonic, and Vaginal Microbiomes of Korean Native Black Pigs
Source: MDPI journal article supplement (doi:10.3390/fermentation9040359), 2023-04-06
Supplement: s1 [file Table_S4.xlsx]

## Sheet: Table_S4
Table S4: Dominant phyla in vaginal microbiota of the JBP gilts
	Sample ID	Treatment group	Firmicutes rel abund (%)	Firmicutes mean (%)	Bacteroidetes rel abund (%)	Bacteroidetes mean (%)	Proteobacteria rel abund (%)	Proteobacteria mean (%)	Actinobacteria rel abund (%)	Actinobacteria mean (%)	Fusobacteria rel abund (%)	Fusobacteria mean (%)	Unclassified Bacteria rel abund (%)	Unclassified Bacteria mean (%)	Other rel abund (%)	Other mean (%)
1	10-34-G	Bacillus-fed	38.3115	32.0114	24.905	31.8362	23.6266	20.1198	7.39038	5.1023	2.70194	4.80615	1.50832	4.44765	1.55626	0.000297128
2	10-35-G	Bacillus-fed	34.0278	32.0114	32.0287	31.8362	14.3783	20.1198	9.66314	5.1023	2.68999	4.80615	4.40111	4.44765	2.81101	0.000297128
3	10-42-G	Bacillus-fed	45.7826	32.0114	19.059	31.8362	20.1761	20.1198	9.71385	5.1023	0.670812	4.80615	2.39751	4.44765	2.20021	0.000297128
4	11-16-G	Bacillus-fed	45.3353	32.0114	18.7796	31.8362	29.9732	20.1198	2.24112	5.1023	0	4.80615	2.9198	4.44765	0.751063	0.000297128
5	11-2-G	Bacillus-fed	41.7804	32.0114	25.5837	31.8362	17.4271	20.1198	9.78918	5.1023	2.02837	4.80615	1.18255	4.44765	2.20871	0.000297128
6	10-G	Control	38.6343	32.0114	37.1845	31.8362	10.0784	20.1198	3.55961	5.1023	3.64157	4.80615	1.08472	4.44765	5.81697	0.000297128
7	6-G	Control	34.3729	32.0114	33.4152	31.8362	13.0862	20.1198	3.55075	5.1023	13.1726	4.80615	1.67247	4.44765	0.729907	0.000297128
8	7-G	Control	26.5726	32.0114	40.1415	31.8362	18.0948	20.1198	0.947307	5.1023	9.54502	4.80615	1.37557	4.44765	3.32328	0.000297128
9	8-G	Control	33.8285	32.0114	43.3849	31.8362	11.6608	20.1198	2.13011	5.1023	5.20543	4.80615	3.20667	4.44765	0.583647	0.000297128
10	9-G	Control	35.239	32.0114	30.9384	31.8362	17.2748	20.1198	5.85301	5.1023	3.4722	4.80615	1.24256	4.44765	5.97999	0.000297128
11	F11-27-G	Control	31.4294	32.0114	30.9922	31.8362	20.263	20.1198	0.807216	5.1023	15.4655	4.80615	0.45253	4.44765	0.590124	0.000297128
12	F11-41-G	Control	14.2936	32.0114	40.3826	31.8362	33.543	20.1198	3.44371	5.1023	2.3326	4.80615	5.7947	4.44765	0.209713	0.000297128
13	F12-20-G	Control	18.7323	32.0114	43.5193	31.8362	18.7801	20.1198	2.71874	5.1023	10.7031	4.80615	5.08176	4.44765	0.464831	0.000297128
14	F12-9-G	Control	41.205	32.0114	35.2684	31.8362	10.2671	20.1198	1.79222	5.1023	0.763738	4.80615	9.42158	4.44765	1.28199	0.000297128
15	F11-33-G	LAB-fed	22.5587	32.0114	37.8186	31.8362	15.9977	20.1198	2.71408	5.1023	7.43831	4.80615	12.667	4.44765	0.805621	0.000297128
16	F11-34-G	LAB-fed	23.9064	32.0114	37.6852	31.8362	17.6114	20.1198	5.99198	5.1023	4.96867	4.80615	8.29478	4.44765	1.54155	0.000297128
17	F12-19-G	LAB-fed	20.032	32.0114	38.2493	31.8362	25.4799	20.1198	4.59101	5.1023	9.49648	4.80615	1.0259	4.44765	1.12548	0.000297128
18	F12-21-G	LAB-fed	31.5354	32.0114	23.0074	31.8362	29.8628	20.1198	5.86893	5.1023	0.71882	4.80615	8.41997	4.44765	0.586722	0.000297128
