# Supplementary material for: Bacillus- and Lactobacillus-Based Dietary Synbiotics Are Associated with Shifts in the Oropharyngeal, Proximal Colonic, and Vaginal Microbiomes of Korean Native Black Pigs
Source: MDPI journal article supplement (doi:10.3390/fermentation9040359), 2023-04-06
Supplement: s1 [file Table_S5.xlsx]

## Sheet: Table_S5
Table S5: Dominant genera in oropharyngeal microbiota of the JBP gilts
	Sample ID	Treatment group	Unclassified Bacteroidales rel abund	Unclassified Bacteroidales mean	Actinobacillus rel abund	Actinobacillus mean	Moraxella rel abund	Moraxella mean	Streptobacillus rel abund	Streptobacillus mean	Neisseria rel abund	Neisseria mean	Unclassified Fusobacteriaceae rel abund	Unclassified Fusobacteriaceae mean	Bergeyella rel abund	Bergeyella mean	Alkanindiges rel abund	Alkanindiges mean	Streptococcus rel abund	Streptococcus mean	Bacteroides rel abund	Bacteroides mean	Unclassified Clostridiales rel abund	Unclassified Clostridiales mean	Unclassified OD1 rel abund	Unclassified OD1 mean	Other rel abund	Other mean
1	10-34-O	Bacillus-fed	32.6401	22.7974	9.30712	9.25422	2.29418	8.98037	15.933	8.70627	15.0173	8.23575	1.29994	5.7591	3.18745	5.55359	2.58726	3.98713	1.87489	2.63334	0.281864	2.61398	3.98676	2.22152	0.933937	1.94468	10.6561	0.000116496
2	10-35-O	Bacillus-fed	24.9865	22.7974	9.18463	9.25422	7.92299	8.98037	5.39544	8.70627	5.91234	8.23575	8.31458	5.7591	8.55666	5.55359	3.36912	3.98713	1.92664	2.63334	3.00031	2.61398	1.38695	2.22152	1.60482	1.94468	18.439	0.000116496
3	10-42-O	Bacillus-fed	21.2621	22.7974	6.08913	9.25422	7.73718	8.98037	6.51198	8.70627	7.07579	8.23575	8.2034	5.7591	10.6365	5.55359	3.14648	3.98713	1.92562	2.63334	1.79551	2.61398	1.05606	2.22152	3.73197	1.94468	20.8284	0.000116496
4	11-16-O	Bacillus-fed	33.3432	22.7974	6.45031	9.25422	13.9573	8.98037	2.09304	8.70627	1.72487	8.23575	7.1848	5.7591	8.73111	5.55359	3.4074	3.98713	1.20023	2.63334	1.96234	2.61398	0.601955	2.22152	2.56429	1.94468	16.7793	0.000116496
5	11-2-O	Bacillus-fed	27.302	22.7974	10.0054	9.25422	10.3558	8.98037	4.2562	8.70627	7.1366	8.23575	3.86974	5.7591	4.53316	5.55359	11.0849	3.98713	3.76926	2.63334	2.07013	2.61398	0.790952	2.22152	1.44407	1.94468	13.3818	0.000116496
6	10-O	Control	26.4967	22.7974	8.04711	9.25422	3.04147	8.98037	7.48797	8.70627	0.395289	8.23575	11.3569	5.7591	6.27343	5.55359	0.542755	3.98713	0.735279	2.63334	1.4808	2.61398	2.49667	2.22152	4.80287	1.94468	26.8428	0.000116496
7	6-O	Control	22.6632	22.7974	7.79355	9.25422	6.28502	8.98037	8.48929	8.70627	8.98098	8.23575	6.85365	5.7591	3.78472	5.55359	2.88495	3.98713	0.804442	2.63334	3.29637	2.61398	2.58893	2.22152	2.80635	1.94468	22.7686	0.000116496
8	7-O	Control	15.7003	22.7974	8.721	9.25422	7.67651	8.98037	5.04753	8.70627	27.3444	8.23575	2.9839	5.7591	7.09089	5.55359	6.21372	3.98713	3.10305	2.63334	0.610977	2.61398	1.21688	2.22152	1.1535	1.94468	13.1373	0.000116496
9	8-O	Control	20.1477	22.7974	5.19359	9.25422	7.99091	8.98037	2.90928	8.70627	2.08044	8.23575	6.0876	5.7591	5.05824	5.55359	15.0277	3.98713	3.07471	2.63334	3.40391	2.61398	1.66268	2.22152	2.49486	1.94468	24.8684	0.000116496
10	9-O	Control	24.47	22.7974	4.36635	9.25422	9.18093	8.98037	6.15243	8.70627	2.84614	8.23575	9.46554	5.7591	6.60065	5.55359	3.69316	3.98713	1.52362	2.63334	7.45279	2.61398	2.08092	2.22152	2.21215	1.94468	19.9553	0.000116496
11	F11-27-O	Control	15.521	22.7974	10.4146	9.25422	12.3916	8.98037	8.60904	8.70627	7.92566	8.23575	5.01059	5.7591	4.99546	5.55359	3.64888	3.98713	6.47569	2.63334	2.40317	2.61398	1.21293	2.22152	2.96046	1.94468	18.431	0.000116496
12	F11-41-O	Control	10.2367	22.7974	20.8102	9.25422	2.20561	8.98037	14.2472	8.70627	1.39745	8.23575	9.7956	5.7591	3.51214	5.55359	6.73469	3.98713	8.7955	2.63334	2.03051	2.61398	2.02714	2.22152	2.07765	1.94468	16.1296	0.000116496
13	F12-20-O	Control	15.1135	22.7974	10.2322	9.25422	8.60839	8.98037	17.5743	8.70627	20.4227	8.23575	2.69766	5.7591	2.85846	5.55359	0.924583	3.98713	1.84055	2.63334	3.11688	2.61398	2.54117	2.22152	1.97694	1.94468	12.0928	0.000116496
14	F12-9-O	Control	23.7996	22.7974	11.9352	9.25422	22.3134	8.98037	4.45231	8.70627	4.22741	8.23575	2.14516	5.7591	5.50287	5.55359	3.18314	3.98713	2.45341	2.63334	1.21727	2.61398	1.15436	2.22152	1.7048	1.94468	15.911	0.000116496
15	F11-33-O	LAB-fed	12.9618	22.7974	11.1887	9.25422	4.8874	8.98037	14.9259	8.70627	22.8706	8.23575	1.77024	5.7591	5.87942	5.55359	1.52794	3.98713	3.57896	2.63334	0.458951	2.61398	5.04704	2.22152	0.873717	1.94468	14.0294	0.000116496
16	F11-34-O	LAB-fed	22.7104	22.7974	10.1978	9.25422	8.18286	8.98037	9.3678	8.70627	2.90578	8.23575	7.86754	5.7591	3.34271	5.55359	3.20131	3.98713	3.24515	2.63334	4.43433	2.61398	3.87721	2.22152	1.22029	1.94468	19.4468	0.000116496
17	F12-19-O	LAB-fed	23.1552	22.7974	7.27559	9.25422	11.3556	8.98037	10.6401	8.70627	4.58932	8.23575	6.97996	5.7591	5.62722	5.55359	2.02206	3.98713	1.82498	2.63334	4.99501	2.61398	2.17308	2.22152	1.74563	1.94468	17.6163	0.000116496
18	F12-21-O	LAB-fed	25.7154	22.7974	10.6642	9.25422	14.1052	8.98037	8.86991	8.70627	5.36068	8.23575	4.32838	5.7591	2.97707	5.55359	3.1721	3.98713	1.59093	2.63334	3.07459	2.61398	1.75531	2.22152	1.41122	1.94468	16.975	0.000116496
