# Supplementary material for: Bacillus- and Lactobacillus-Based Dietary Synbiotics Are Associated with Shifts in the Oropharyngeal, Proximal Colonic, and Vaginal Microbiomes of Korean Native Black Pigs
Source: MDPI journal article supplement (doi:10.3390/fermentation9040359), 2023-04-06
Supplement: s1 [file Table_S6.xlsx]

## Sheet: Table_S6
Table S6: Dominant genera in proximal colonic microbiota of the JBP gilts
	Sample ID	Treatment group	Unclassified Ruminococcaceae rel abund	Unclassified Ruminococcaceae mean	Unclassified Clostridiales rel abund	Unclassified Clostridiales mean	Streptococcus rel abund	Streptococcus mean	Unclassified Bacteroidales rel abund	Unclassified Bacteroidales mean	Lactobacillus rel abund	Lactobacillus mean	Unclassified S24-7 rel abund	Unclassified S24-7 mean	Prevotella rel abund	Prevotella mean	Clostridium rel abund	Clostridium mean	Unclassified Bacteria rel abund	Unclassified Bacteria mean	Treponema rel abund	Treponema mean	Unclassified Bacilli rel abund	Unclassified Bacilli mean	Other rel abund	Other mean
1	10-34-S	Bacillus-fed	11.4897	17.6182	26.2986	17.4455	17.01	9.68274	5.1171	7.39863	1.38229	5.81788	4.09579	5.57987	5.28614	5.22943	11.2784	4.939	2.19053	4.43791	3.7577	3.21481	5.55203	1.8181	6.54164	0.000130873
2	10-35-S	Bacillus-fed	14.3213	17.6182	17.6124	17.4455	10.7382	9.68274	11.867	7.39863	1.70919	5.81788	1.82526	5.57987	9.97622	5.22943	4.88047	4.939	6.4867	4.43791	9.07951	3.21481	2.45615	1.8181	9.04768	0.000130873
3	10-42-S	Bacillus-fed	6.90777	17.6182	14.1772	17.4455	16.1606	9.68274	7.53554	7.39863	3.20027	5.81788	2.63164	5.57987	21.1805	5.22943	3.64381	4.939	7.39452	4.43791	1.46025	3.21481	1.53759	1.8181	14.1704	0.000130873
4	11-16-S	Bacillus-fed	16.3248	17.6182	25.0258	17.4455	21.1357	9.68274	7.34925	7.39863	1.22488	5.81788	1.68531	5.57987	6.68811	5.22943	3.22009	4.939	2.4468	4.43791	6.74124	3.21481	0.60801	1.8181	7.54995	0.000130873
5	11-2-S	Bacillus-fed	14.6242	17.6182	11.9783	17.4455	6.41176	9.68274	5.58997	7.39863	2.68391	5.81788	7.57672	5.57987	17.2323	5.22943	7.44667	4.939	2.51775	4.43791	1.19746	3.21481	3.96987	1.8181	18.7711	0.000130873
6	10-33-S	Control	11.2129	17.6182	18.5729	17.4455	20.63	9.68274	8.39037	7.39863	1.28432	5.81788	2.59439	5.57987	10.97	5.22943	9.12637	4.939	1.24752	4.43791	1.27696	3.21481	4.87598	1.8181	9.81821	0.000130873
7	10-40-S	Control	10.0299	17.6182	14.1208	17.4455	16.8381	9.68274	14.6881	7.39863	4.00133	5.81788	1.70537	5.57987	15.1692	5.22943	4.49569	4.939	2.73723	4.43791	3.92833	3.21481	0.89582	1.8181	11.3902	0.000130873
8	10-43-S	Control	11.0826	17.6182	16.3922	17.4455	11.1335	9.68274	9.05665	7.39863	4.67228	5.81788	5.09569	5.57987	19.9403	5.22943	3.0083	4.939	2.65052	4.43791	1.54331	3.21481	0.539842	1.8181	14.8848	0.000130873
9	11-21-S	Control	15.0177	17.6182	14.6643	17.4455	10.6413	9.68274	8.80742	7.39863	4.44876	5.81788	6.04947	5.57987	15.924	5.22943	4.85689	4.939	2.37102	4.43791	1.49117	3.21481	1.0371	1.8181	14.6908	0.000130873
10	11-5-S	Control	12.3034	17.6182	12.9817	17.4455	12.5455	9.68274	14.0766	7.39863	11.335	5.81788	4.68713	5.57987	13.8258	5.22943	2.3621	4.939	2.13527	4.43791	1.69906	3.21481	0.403498	1.8181	11.6447	0.000130873
11	F11-27-S	Control	15.1865	17.6182	24.4335	17.4455	10.0262	9.68274	2.76696	7.39863	8.39628	5.81788	1.23241	5.57987	10.1773	5.22943	2.98958	4.939	1.70152	4.43791	2.23424	3.21481	0.850759	1.8181	20.0048	0.000130873
12	F11-41-S	Control	39.9786	17.6182	21.8581	17.4455	0.10174	9.68274	5.42436	7.39863	6.24632	5.81788	2.8407	5.57987	3.98929	5.22943	2.20616	4.939	5.09772	4.43791	6.57564	3.21481	0.409639	1.8181	5.27175	0.000130873
13	F12-20-S	Control	45.6629	17.6182	11.3831	17.4455	4.72005	9.68274	2.38536	7.39863	2.99339	5.81788	11.1102	5.57987	6.18167	5.22943	1.9839	4.939	1.77733	4.43791	0.670395	3.21481	0.43069	1.8181	10.701	0.000130873
14	F12-9-S	Control	14.4175	17.6182	16.5793	17.4455	21.3691	9.68274	7.33981	7.39863	4.46295	5.81788	4.88934	5.57987	7.77118	5.22943	8.03829	4.939	2.13691	4.43791	1.78518	3.21481	1.79348	1.8181	9.417	0.000130873
15	F11-33-S	LAB-fed	30.9047	17.6182	12.0037	17.4455	2.5715	9.68274	1.98282	7.39863	12.2488	5.81788	17.6219	5.57987	2.22797	5.22943	4.11073	4.939	5.08297	4.43791	0.962228	3.21481	0.98891	1.8181	9.29375	0.000130873
16	F11-34-S	LAB-fed	15.3779	17.6182	16.8422	17.4455	4.2049	9.68274	10.5828	7.39863	0.348232	5.81788	3.39874	5.57987	10.5149	5.22943	2.70924	4.939	15.9995	4.43791	6.32215	3.21481	1.2902	1.8181	12.4092	0.000130873
17	F12-19-S	LAB-fed	14.8821	17.6182	10.1994	17.4455	2.88883	9.68274	8.86094	7.39863	22.3521	5.81788	8.15494	5.57987	10.4762	5.22943	6.09124	4.939	1.8815	4.43791	0.604394	3.21481	1.55916	1.8181	12.0493	0.000130873
18	F12-21-S	LAB-fed	21.5902	17.6182	27.1225	17.4455	1.36022	9.68274	4.97409	7.39863	5.44247	5.81788	5.66222	5.57987	7.79719	5.22943	4.618	4.939	3.74862	4.43791	3.47593	3.21481	1.68583	1.8181	12.5227	0.000130873
