# Supplementary material for: Bacillus- and Lactobacillus-Based Dietary Synbiotics Are Associated with Shifts in the Oropharyngeal, Proximal Colonic, and Vaginal Microbiomes of Korean Native Black Pigs
Source: MDPI journal article supplement (doi:10.3390/fermentation9040359), 2023-04-06
Supplement: s1 [file Table_S7.xlsx]

## Sheet: Table_S7
Table S7: Dominant genera in vaginal microbiota of the JBP gilts
	Sample ID	Treatment group	Unclassified Bacteroidales rel abund	Unclassified Bacteroidales mean	Unclassified Clostridiales rel abund	Unclassified Clostridiales mean	Bacteroides rel abund	Bacteroides mean	Unclassified Pasteurellaceae rel abund	Unclassified Pasteurellaceae mean	Streptococcus rel abund	Streptococcus mean	Unclassified Fusobacteriaceae rel abund	Unclassified Fusobacteriaceae mean	Unclassified Bacteria rel abund	Unclassified Bacteria mean	Campylobacter rel abund	Campylobacter mean	Prevotella rel abund	Prevotella mean	Pasteurella rel abund	Pasteurella mean	Unclassified Ruminococcaceae rel abund	Unclassified Ruminococcaceae mean	Clostridium rel abund	Clostridium mean	Mannheimia rel abund	Mannheimia mean	Abiotrophia rel abund	Abiotrophia mean	Anaerococcus rel abund	Anaerococcus mean	Bergeyella rel abund	Bergeyella mean	Rothia rel abund	Rothia mean	Lactobacillus rel abund	Lactobacillus mean	Moraxella rel abund	Moraxella mean	Veillonella rel abund	Veillonella mean	Other rel abund	Other mean
1	10-34-G	Bacillus-fed	7.3953	15.6207	7.3535	7.92318	6.15988	5.9673	8.61596	5.75991	7.79358	5.33686	2.63679	4.71479	1.50832	4.44765	3.31166	3.51355	6.30862	3.35221	0.266752	3.15463	2.14508	2.49733	9.53423	2.30244	4.00988	2.20342	1.23788	1.89221	0.442538	1.80192	1.16412	1.64288	3.05474	1.637	2.04674	1.53293	1.41243	1.44935	0.245854	1.26667	23.3562	0.000150463
2	10-35-G	Bacillus-fed	17.6581	15.6207	6.5289	7.92318	1.11062	5.9673	0.955897	5.75991	9.16528	5.33686	2.6808	4.71479	4.40111	4.44765	3.06684	3.51355	5.26969	3.35221	1.19334	3.15463	1.98686	2.49733	0.412077	2.30244	1.29904	2.20342	1.96847	1.89221	0.899217	1.80192	4.588	1.64288	2.47246	1.637	2.59961	1.53293	1.20253	1.44935	0.303313	1.26667	30.2379	0.000150463
3	10-42-G	Bacillus-fed	9.22673	15.6207	6.06044	7.92318	1.23957	5.9673	1.0967	5.75991	10.3452	5.33686	0.608221	4.71479	2.39751	4.44765	1.88453	3.51355	4.08338	3.35221	7.60072	3.15463	2.89279	2.49733	0.864028	2.30244	1.57974	2.20342	8.21575	1.89221	0.651763	1.80192	2.16483	1.64288	3.5051	1.637	2.27641	1.53293	2.25736	1.44935	0.498007	1.26667	30.5512	0.000150463
4	10-G	Control	12.294	15.6207	13.0465	7.92318	1.06386	5.9673	0.12069	5.75991	4.87231	5.33686	3.63859	4.71479	1.08472	4.44765	2.13517	3.51355	19.2583	3.35221	0.30396	3.15463	9.76696	2.49733	1.86697	2.30244	0.0983401	2.20342	0.460411	1.89221	0.0908901	1.80192	0.572161	1.64288	1.26799	1.637	2.26927	1.53293	0.561731	1.44935	1.84313	1.26667	23.3841	0.000150463
5	11-16-G	Bacillus-fed	15.5431	15.6207	7.02199	7.92318	0.0361958	5.9673	3.75833	5.75991	8.40346	5.33686	0	4.71479	2.9198	4.44765	5.14886	3.51355	1.57452	3.35221	19.3436	3.15463	6.05375	2.49733	0.500709	2.30244	0	2.20342	1.7193	1.89221	1.70422	1.80192	0	1.64288	0.0844569	1.637	4.33747	1.53293	0.108587	1.44935	0	1.26667	21.7416	0.000150463
6	11-2-G	Bacillus-fed	8.83484	15.6207	6.61177	7.92318	0.528239	5.9673	7.73368	5.75991	12.6203	5.33686	1.88953	4.71479	1.18255	4.44765	0.279281	3.51355	9.96633	3.35221	0.627184	3.15463	3.62107	2.49733	0.965513	2.30244	0.134055	2.20342	1.64377	1.89221	0.0590479	1.80192	2.96995	1.64288	4.74777	1.637	4.86267	1.53293	3.19816	1.44935	0.0335137	1.26667	27.4908	0.000150463
7	6-G	Control	12.901	15.6207	7.50487	7.92318	8.82611	5.9673	5.23283	5.75991	5.39061	5.33686	13.1068	4.71479	1.67247	4.44765	1.61485	3.51355	10.2996	3.35221	0.0397882	3.15463	2.23774	2.49733	4.0186	2.30244	0	2.20342	2.4161	1.89221	0.666795	1.80192	0.766951	1.64288	1.25813	1.637	0.841039	1.53293	1.11407	1.44935	4.40277	1.26667	15.6889	0.000150463
8	7-G	Control	13.0773	15.6207	10.112	7.92318	12.8032	5.9673	3.16568	5.75991	2.71516	5.33686	9.54502	4.71479	1.37557	4.44765	3.95368	3.51355	12.6782	3.35221	6.11381	3.15463	2.75456	2.49733	2.8265	2.30244	2.99952	2.20342	0.601274	1.89221	0.464232	1.80192	0.126764	1.64288	0.310059	1.637	1.27107	1.53293	0.137043	1.44935	1.83123	1.26667	11.1381	0.000150463
9	8-G	Control	10.228	15.6207	9.67012	7.92318	25.8484	5.9673	2.22355	5.75991	3.80251	5.33686	5.19866	4.71479	3.20667	4.44765	3.92574	3.51355	6.84126	3.35221	0.622918	3.15463	1.97709	2.49733	10.0019	2.30244	0.0622918	2.20342	1.24854	1.89221	1.92969	1.80192	0.181459	1.64288	0.442813	1.637	0.56198	1.53293	0.0826043	1.44935	0.771877	1.26667	11.1719	0.000150463
10	9-G	Control	16.3875	15.6207	4.02092	7.92318	1.49651	5.9673	2.20848	5.75991	5.95882	5.33686	3.01116	4.71479	1.24256	4.44765	5.16522	3.51355	6.48638	3.35221	0.609185	3.15463	2.3672	2.49733	11.9343	2.30244	0.00906975	2.20342	3.64755	1.89221	0.202558	1.80192	2.81464	1.64288	2.48813	1.637	1.91825	1.53293	3.02476	1.44935	0.343139	1.26667	24.6637	0.000150463
11	F11-27-G	Control	6.72068	15.6207	20.9448	7.92318	19.7554	5.9673	6.19171	5.75991	2.06085	5.33686	15.4655	4.71479	0.45253	4.44765	3.15242	3.51355	4.28069	3.35221	4.45498	3.15463	0.0458645	2.49733	1.18025	2.30244	1.69393	2.20342	0.908118	1.89221	0.165112	1.80192	0.165112	1.64288	0.113133	1.637	0.152882	1.53293	0.137594	1.44935	2.06696	1.26667	9.89145	0.000150463
12	F11-33-G	LAB-fed	22.1037	15.6207	8.7406	7.92318	3.14166	5.9673	2.45988	5.75991	3.90426	5.33686	7.02637	4.71479	12.667	4.44765	2.39861	3.51355	11.1562	3.35221	2.12225	3.15463	0.263326	2.49733	0.190325	2.30244	6.2012	2.20342	0.46799	1.89221	0.495366	1.80192	0.890355	1.64288	0.922945	1.637	0.177289	1.53293	0.638761	1.44935	4.37095	1.26667	9.66094	0.000150463
13	F11-34-G	LAB-fed	23.7395	15.6207	7.84828	7.92318	3.14604	5.9673	2.92352	5.75991	2.15055	5.33686	4.90279	4.71479	8.29478	4.44765	3.98489	3.51355	5.69772	3.35221	0.863735	3.15463	0.786145	2.49733	0.844703	2.30244	3.4198	2.20342	2.6278	1.89221	0.756866	1.80192	3.29976	1.64288	1.7099	1.637	0.666101	1.53293	2.28524	1.44935	1.56643	1.26667	18.4854	0.000150463
14	F11-41-G	Control	35.103	15.6207	3.36277	7.92318	0.743194	5.9673	22.2075	5.75991	2.14864	5.33686	2.3326	4.71479	5.7947	4.44765	5.96026	3.51355	4.07653	3.35221	4.03238	3.15463	0.0367918	2.49733	2.44297	2.30244	0.154525	2.20342	0.463576	1.89221	1.33554	1.80192	0.298013	1.64288	0.183959	1.637	0.139809	1.53293	0.231788	1.44935	1.15526	1.26667	7.79617	0.000150463
15	F12-19-G	LAB-fed	8.55836	15.6207	7.33462	7.92318	16.0004	5.9673	4.6657	5.75991	2.15531	5.33686	9.42704	4.71479	1.0259	4.44765	5.78987	3.51355	9.73625	3.35221	0.0458577	3.15463	1.18968	2.49733	0.622355	2.30244	6.92583	2.20342	0.518848	1.89221	0.956461	1.80192	2.62961	1.64288	1.41897	1.637	0.569946	1.53293	4.10623	1.44935	2.65582	1.26667	13.6669	0.000150463
16	F12-20-G	Control	17.1166	15.6207	9.05151	7.92318	21.0609	5.9673	6.34024	5.75991	1.71435	5.33686	10.6552	4.71479	5.08176	4.44765	5.56602	3.51355	3.67232	3.35221	0.227184	3.15463	0.213733	2.49733	0.346755	2.30244	4.45252	2.20342	1.36161	1.89221	0.813081	1.80192	1.23905	1.64288	1.10005	1.637	0.309389	1.53293	0.703973	1.44935	0.0239141	1.26667	8.94987	0.000150463
17	F12-21-G	LAB-fed	19.0444	15.6207	3.6713	7.92318	0.667353	5.9673	19.1971	5.75991	0.732544	5.33686	0.650197	4.71479	8.41997	4.44765	2.00034	3.51355	0.782295	3.35221	4.30262	3.15463	0.473495	2.49733	0.293361	2.30244	0	2.20342	2.21307	1.89221	13.5718	1.80192	1.40504	1.64288	1.26437	1.637	0.442615	1.53293	1.10139	1.44935	0.204152	1.26667	19.5625	0.000150463
18	F12-9-G	Control	27.0919	15.6207	13.6863	7.92318	1.5355	5.9673	2.13398	5.75991	8.3209	5.33686	0.763738	4.71479	9.42158	4.44765	6.8576	3.51355	2.87365	3.35221	0.0112314	3.15463	11.8652	2.49733	1.06057	2.30244	0.150822	2.20342	0.256719	1.89221	0.715604	1.80192	0.0914561	1.64288	0.117128	1.637	0.72844	1.53293	0.120337	1.44935	0.0224629	1.26667	12.1749	0.000150463
